# Supplementary material
Source: publisher figshare collection journal article supplement (https://gsajournals.figshare.com/ndownloader/files/20411307)
Supplement: Supplementary file 1 [file 20411307]

## Sheet: Top 10
CTRL vs Spen-KD
MYD		HYD		HSD		HFD
Compound	p[1]	Compound	p[1]	Compound	p[1]	Compound	p[1]
Putrescine	-1.4434	Putrescine	-2.6418	L-Carnitine	0.53183	L-Carnitine	0.42474
1-4-beta-D-Xylan	-1.0535	L-Carnitine	2.4696	Acetylcholine	-0.52578	Acetylcholine	-0.29245
L-Carnitine	0.93427	L-asparagine	2.3146	Putrescine	-0.49388	L-methionine	0.28634
Ornithine	-0.89687	1-4-beta-D-Xylan	-2.2022	Pyruvate	-0.42177	5-Oxoproline	0.2801
Dimethylglycine	-0.84096	L-glutamate	2.1813	L-threonine	-0.41542	Inosine	0.27437
Triacanthine	0.83115	Lactate	-2.1453	1-4-beta-D-Xylan	-0.41485	Hypoxanthine	0.22475
L-lysine	-0.76629	L-lysine	-1.8958	5-6-Dihydrothymine	-0.39444	L-asparagine	0.22262
5-Oxoproline	0.70745	Succinate	-1.8611	Fumarate	0.32383	Nicotinic acid	0.21735
Ethanolamine phosphate	-0.7004	L-alanine	-1.8031	5-L-Glutamyl-L-glutamine	-0.32089	D-Arabitol	-0.20822
L-threonine	-0.66722	Ornithine	-1.7939	L-asparagine	0.31134	Guanosine	0.20326
CTRL MYD vs Other Diets
HYD		HSD		HFD
Compound	p[1]	Compound	p[1]	Compound	p[1]
L-arginine	2.2161	5-6-Dihydrothymine	0.37795	Triacanthine	0.72399
Ornithine	-2.0132	3-Oxalomalate	0.30276	Spermidine	0.60541
1-4-beta-D-Xylan	-1.9076	L-glutamine	0.25331	Decanoic acid caprate	-0.55696
L-Carnitine	1.7777	kynurenine	-0.23051	Cystathionine	0.54918
Dodecanoic acid	1.7606	Triacanthine	0.21998	Hexanoic acid caproate	-0.53349
Octadecatrienoic acid	1.7602	6-Phospho-D-gluconate	0.20799	5-6-Dihydrothymine	0.52374
g-Oxalo-crotonate	-1.7342	gamma-L-Glutamyl-L-cysteine	0.17347	3-Oxalomalate	0.51298
Linoleate	1.6928	sn-glycero-3-Phosphoethanolamine	-0.16997	alpha-D-Ribose 1-phosphate	0.51248
alpha-D-Glucosamine 1-phosphate	1.6853	Cystathionine	0.16065	D-Glucose 6-phosphate	0.4988
NAD	1.669	L-glutamate	0.15061	NAD	0.48387
Spen-KD MYD vs Other Diets
HYD		HSD		HFD
Compound	p[1]	Compound	p[1]	Compound	p[1]
Putrescine	0.82917	1-4-beta-D-Xylan	1.8684	Octanoic acid	-1.5661
Pantothenol	-0.79768	Nicotinic acid	-1.6282	Cystathionine	1.3545
g-Oxalo-crotonate	-0.76282	L-lysine	1.568	Nicotinic acid	-1.2141
2',3'-Cyclic CMP	-0.7603	Cystathionine	1.4908	2-Hydroxyglutarate	1.2035
acyl-C5-OH	-0.72052	Ethanolamine phosphate	1.4781	Dimethylglycine	1.1503
NAD	0.70795	Uracil	-1.478	Decanoic acid caprate	-1.1368
Ethanolamine phosphate	0.70439	Dimethylglycine	1.3478	Putrescine	1.1246
alpha-D-Glucosamine 1-phosphate	0.69866	Hypoxanthine	-1.3342	1-4-beta-D-Xylan	1.1154
2-Oxoglutarate	0.69856	Acetylcholine	-1.3157	Itaconate	1.1102
Linoleate	0.67956	D-Erythrose 4-phosphate	1.2768	D-Erythrose 4-phosphate	1.1083

## Sheet: OPLSDA_loadings
		CTRL vs Spen-KD								CTRL MYD vs Other Diets						Spen-KD MYD vs Other Diets
		MYD		HYD		HSD		HFD		HYD		HSD		HFD		HYD		HSD		HFD
	Compound	p[1]	p(corr)[1]	p[1]	p(corr)[1]	p[1]	p(corr)[1]	p[1]	p(corr)[1]	p[1]	p(corr)[1]	p[1]	p(corr)[1]	p[1]	p(corr)[1]	p[1]	p(corr)[1]	p[1]	p(corr)[1]	p[1]	p(corr)[1]
1	L-alanine	-0.66368	-0.6765	-1.8031	-0.54933	-0.042684	-0.081131	0.09469	0.16434	1.0667	0.30634	-0.11414	-0.27426	0.13336	0.18256	0.52333	0.50736	0.74218	0.24484	0.9607	0.64918
2	L-arginine	-0.051274	-0.055218	-0.35905	-0.10939	-0.1653	-0.31532	0.099207	0.1478	2.2161	0.63644	0.14367	0.28218	0.42157	0.4539	0.54297	0.54384	-0.43703	-0.14417	0.72524	0.50397
3	L-asparagine	0.39932	0.46702	2.3146	0.70516	0.31134	0.49654	0.22262	0.47139	-1.1034	-0.31686	0.064806	0.13879	0.25628	0.35088	-0.10741	-0.10861	-0.64932	-0.21421	0.11295	0.078297
4	L-aspartate	-0.061319	-0.084049	0.53429	0.16277	0.13607	0.25323	0.10547	0.19183	-0.47546	-0.13654	0.004338	0.011501	0.044432	0.051621	0.049882	0.073696	1.1211	0.36983	0.38323	0.3422
5	L-glutamate	0.66191	0.54906	2.1813	0.66453	0.20198	0.28879	0.19238	0.31365	0.90988	0.2613	0.15061	0.24367	0.039553	0.039826	0.34111	0.38151	-0.43652	-0.144	-0.3645	-0.26947
6	L-glutamine	-0.052182	-0.058961	0.87275	0.26589	-0.24535	-0.38996	-0.016623	-0.028777	-0.16006	-0.045966	0.25331	0.48068	0.42337	0.49383	0.16719	0.16878	0.01576	0.0051991	0.39448	0.31819
7	glycine	0.12949	0.13094	0.49264	0.15009	0.0092981	0.016814	0.04497	0.07458	-0.90257	-0.2592	0.048922	0.11105	-0.25944	-0.26392	-0.27382	-0.27976	-0.2113	-0.069707	-0.5361	-0.41441
8	L-histidine	-0.33206	-0.3765	0.90372	0.27532	-0.061305	-0.11151	0.0014704	0.002562	-0.039067	-0.011219	-0.026077	-0.063555	0.30321	0.4136	0.52769	0.50025	0.30704	0.10129	0.77914	0.525
9	L-leucine	0.028427	0.03557	-1.1521	-0.35099	0.13933	0.23426	0.050715	0.1146	0.75401	0.21654	0.016131	0.0456	0.13262	0.18123	-0.17242	-0.18681	0.13556	0.044721	0.13211	0.12751
10	L-lysine	-0.76629	-0.82856	-1.8958	-0.57756	-0.2718	-0.5244	-0.11159	-0.22398	-0.96869	-0.27819	0.033401	0.076276	0.18146	0.28162	0.34568	0.40931	1.568	0.51726	0.90512	0.70236
11	L-methionine	0.32632	0.39861	0.90002	0.2742	0.279	0.41974	0.28634	0.47649	1.1711	0.33632	0.12933	0.32691	0.23963	0.31067	-0.10065	-0.094444	0.15938	0.052579	0.40185	0.26035
12	L-phenylalanine	-0.096029	-0.11019	-1.3761	-0.41923	-0.019099	-0.029479	0.042572	0.087139	0.78907	0.22661	0.082031	0.23084	0.18396	0.27583	-0.11451	-0.13324	0.52948	0.17467	0.38451	0.2993
13	L-proline	-0.086012	-0.097611	-0.12609	-0.038413	-0.092331	-0.14719	0.16121	0.28384	1.5806	0.45393	-0.087871	-0.15444	-0.11804	-0.15183	0.47295	0.50423	-0.76706	-0.25305	0.15207	0.11531
14	L-serine	-0.32968	-0.35804	0.32897	0.10022	-0.17489	-0.25903	0.087619	0.16139	-0.89904	-0.25819	0.056846	0.14506	-0.27077	-0.29045	-0.13935	-0.12258	0.68266	0.2252	0.16384	0.13222
15	L-threonine	-0.66722	-0.70268	-1.1222	-0.34187	-0.41542	-0.61264	-0.17815	-0.33212	-0.46828	-0.13448	0.050584	0.090548	0.1868	0.24356	0.38085	0.39779	0.80206	0.26459	0.50895	0.36361
16	L-tryptophan	-0.10534	-0.10998	0.54077	0.16475	-0.040531	-0.060381	0.027643	0.056815	-0.54169	-0.15556	-0.085189	-0.17018	-0.081693	-0.10918	-0.031801	-0.032476	-0.62342	-0.20566	0.059435	0.044723
17	L-tyrosine	-0.11441	-0.11736	0.26818	0.081703	0.012	0.017585	0.16597	0.30309	1.2822	0.36823	0.1077	0.23741	0.27574	0.35254	0.55117	0.47224	0.82639	0.27262	0.83279	0.56403
18	L-valine	-0.23385	-0.26328	-1.2619	-0.38446	-0.063534	-0.10762	-0.0050048	-0.0089063	0.033554	0.0096361	-0.0092106	-0.021797	0.14719	0.17528	-0.069216	-0.073834	0.2392	0.078911	0.40154	0.29495
19	AMP	-0.19922	-0.22656	0.45546	0.13876	-0.057004	-0.090859	0.024227	0.045705	1.0337	0.29685	0.036437	0.081649	0.36006	0.45663	0.66359	0.64555	0.61651	0.20338	0.94612	0.67888
20	Adenosine	0.40973	0.45466	0.77847	0.23717	0.077206	0.15207	0.11063	0.19282	0.38637	0.11096	-0.0024983	-0.0058524	0.14425	0.17122	-0.085631	-0.094527	-0.72698	-0.23982	-0.24932	-0.17296
21	Adenine	0.43473	0.43285	0.43246	0.13175	-0.010149	-0.016407	0.022134	0.039677	-0.85132	-0.24448	0.075169	0.14385	-0.2823	-0.34307	-0.37401	-0.41278	-0.93493	-0.30842	-0.84017	-0.56538
22	Guanosine	0.37662	0.42216	0.59227	0.18044	0.27048	0.42971	0.20326	0.4018	0.35884	0.10305	-0.1371	-0.2472	-0.22424	-0.29437	-0.16862	-0.20703	-1.0519	-0.347	-0.35865	-0.32714
23	Cytidine	-0.43713	-0.45475	0.33859	0.10315	-0.08339	-0.1304	-0.022968	-0.061118	0.58691	0.16855	-0.036863	-0.08418	0.2053	0.31959	0.60469	0.59137	0.5586	0.18428	0.70229	0.53997
24	Thymidine	0.43738	0.4744	0.85006	0.25897	-0.025432	-0.047901	-0.066986	-0.10045	-1.3572	-0.38977	0.097417	0.19501	-0.26177	-0.28138	-0.49804	-0.53678	-0.95602	-0.31538	-0.82185	-0.57781
25	Thymine	0.03908	0.0346	1.5384	0.46867	-0.094906	-0.18446	0.049681	0.1009	0.2073	0.059532	-0.056995	-0.095924	-0.34237	-0.4743	0.47753	0.44668	-0.74345	-0.24526	-0.47179	-0.45707
26	UMP	0.26934	0.23408	0.67928	0.20694	0.092265	0.14505	0.047519	0.08622	1.0919	0.31358	0.082993	0.13104	0.41918	0.40332	0.45123	0.43443	0.3198	0.1055	0.61529	0.52377
27	Uracil	0.61925	0.67804	-0.26005	-0.079225	0.08026	0.13789	0.022511	0.037154	-0.22015	-0.063225	0.0061034	0.013566	-0.28267	-0.33902	-0.2383	-0.38447	-1.478	-0.48757	-0.87564	-0.67001
28	IMP	0.061567	0.068394	-0.27697	-0.08438	0.023625	0.042079	0.11979	0.20483	1.6213	0.46561	0.014139	0.027728	0.239	0.2298	0.56908	0.47231	0.0026973	0.00088981	0.62759	0.5219
29	Inosine	0.46794	0.48375	0.35619	0.10851	0.2684	0.36106	0.27437	0.51751	0.042707	0.012265	-0.071996	-0.11693	-0.27523	-0.30595	-0.46648	-0.49917	-1.1997	-0.39578	-0.61123	-0.52047
30	Hypoxanthine	0.45479	0.44128	-0.20096	-0.061223	0.13885	0.18184	0.22475	0.41242	-0.58845	-0.16899	-0.043042	-0.067034	-0.42363	-0.46135	-0.66531	-0.61648	-1.3342	-0.44014	-0.73396	-0.63992
31	Xanthine	-0.248	-0.22079	-1.2027	-0.3664	-0.080964	-0.14526	0.016826	0.02952	-0.25354	-0.072812	-0.0010388	-0.0028477	-0.18017	-0.21242	-0.27106	-0.2604	-0.091179	-0.030079	0.11457	0.07246
32	Allantoate	0.35671	0.3498	-0.24386	-0.074294	-0.044721	-0.078949	-0.045731	-0.074681	0.46051	0.13225	-0.011875	-0.025132	-0.35969	-0.44956	-0.30518	-0.27704	-0.89881	-0.29651	-0.71798	-0.57789
33	S-Allantoin	0.28221	0.30866	0.39874	0.12148	0.039022	0.064128	-0.042111	-0.064876	-0.53154	-0.15265	0.07969	0.18823	-0.13513	-0.13883	-0.25806	-0.32184	-0.13092	-0.04319	-0.44878	-0.32098
34	5-Hydroxyisourate	0.2628	0.32272	0.11691	0.035617	0.074929	0.15191	0.12263	0.23338	0.92045	0.26434	0.055167	0.12427	-0.06711	-0.077371	0.18354	0.181	-0.62363	-0.20573	-0.18433	-0.17349
35	Urate	0.18113	0.2747	-0.32974	-0.10046	0.086433	0.16355	0.028258	0.052234	0.63573	0.18257	0.027963	0.076644	0.0086224	0.014108	-0.085274	-0.11463	-0.15914	-0.0525	-0.23563	-0.20235
36	2',3'-Cyclic CMP	0.35287	0.37645	-0.10608	-0.032319	0.060841	0.10427	0.026594	0.041353	-1.0915	-0.31345	0.0073369	0.015362	-0.37248	-0.32916	-0.7603	-0.58402	-0.94248	-0.31091	-0.92329	-0.64657
37	5-6-Dihydrothymine	-0.051968	-0.062468	0.71884	0.219	-0.39444	-0.62162	-0.15144	-0.24281	-1.4631	-0.42018	0.37795	0.73978	0.52374	0.5766	-0.040964	-0.05299	0.065194	0.021507	0.42629	0.36956
38	Nicotinamide	0.42958	0.5114	0.73135	0.22281	0.0019801	0.0030103	-0.027403	-0.044882	-0.90151	-0.2589	0.072811	0.14584	-0.29384	-0.31239	-0.36773	-0.43167	-1.1581	-0.38206	-0.76707	-0.61138
39	Flavin mononucleotide	0.35792	0.37644	-0.61272	-0.18667	0.016563	0.027281	-0.17123	-0.2873	0.16391	0.047072	0.066203	0.11453	-0.096026	-0.096791	-0.32625	-0.37129	-0.77477	-0.25559	-0.74757	-0.51939
40	NAD	0.18991	0.19109	0.60193	0.18338	0.14208	0.20734	0.089403	0.19626	1.669	0.47932	0.087339	0.16238	0.48387	0.48273	0.70795	0.57562	0.6131	0.20226	0.99971	0.61715
41	Phosphate	0.12746	0.16215	0.72023	0.21942	-0.086736	-0.15796	0.054701	0.10747	0.3859	0.11083	0.085833	0.21471	0.12282	0.17305	0.39021	0.33558	-0.1233	-0.040674	0.40179	0.28324
42	Diphosphate	-0.18726	-0.15841	-0.46564	-0.14186	-0.016485	-0.031818	0.10091	0.15995	1.412	0.4055	0.015373	0.035488	0.2854	0.30035	0.56511	0.49534	0.54734	0.18056	0.84019	0.57118
43	D-Glucose	0.38904	0.41277	-1.1495	-0.35019	0.19311	0.30266	0.10323	0.18362	1.1948	0.34314	-0.025529	-0.05147	0.1103	0.14051	-0.46087	-0.42931	-1.0392	-0.34282	-0.26629	-0.20556
44	D-Glucose 6-phosphate	0.16279	0.17656	-0.29806	-0.090807	0.1763	0.26578	0.050896	0.070911	1.5386	0.44185	0.0576	0.11698	0.4988	0.54774	0.4247	0.35627	0.67174	0.2216	1.061	0.70391
45	D-Glyceraldehyde 3-phosphate/Glycerone phosphate	-0.16773	-0.13529	0.88808	0.27056	-0.076199	-0.098104	-0.036712	-0.061145	0.2999	0.086126	0.070128	0.11076	0.24079	0.23113	0.51333	0.47912	0.77571	0.2559	0.56568	0.42686
46	2/3-Phospho-D-glycerate	0.073834	0.084891	0.020248	0.0061687	0.017709	0.024914	0.059672	0.10374	1.2843	0.36883	0.062547	0.13605	0.32876	0.4283	0.45031	0.40762	0.3289	0.1085	0.73569	0.54862
47	Pyruvate	-0.60118	-0.47907	-0.85983	-0.26195	-0.42177	-0.56727	-0.17677	-0.34203	0.29168	0.083765	-0.031735	-0.062864	-0.076862	-0.113	0.521	0.39868	-0.93995	-0.31008	-0.1038	-0.093855
48	Lactate	-0.30787	-0.31003	-2.1453	-0.65357	-0.11701	-0.1862	-0.083632	-0.1627	0.32364	0.092944	-0.095699	-0.18372	0.13278	0.1869	-0.17422	-0.1531	-0.53642	-0.17696	0.33962	0.24155
49	Maltose	0.33031	0.45575	-0.47068	-0.14339	0.010304	0.026471	-0.03298	-0.058357	0.3847	0.11048	0.0026859	0.0091237	-0.17446	-0.19045	-0.27856	-0.27851	-1.0129	-0.33416	-0.58067	-0.49565
50	Maltotriose	0.015308	0.016494	-0.63097	-0.19223	0.0015017	0.0019905	0.056886	0.11193	0.89557	0.25719	-0.11011	-0.19219	0.24528	0.29377	0.077976	0.078388	-0.90229	-0.29766	0.67613	0.48495
51	D-Arabitol	-0.037462	-0.046577	-0.25772	-0.078516	-0.14167	-0.25046	-0.20822	-0.40396	-0.26541	-0.076221	-0.06038	-0.12906	-0.41089	-0.44279	-0.1918	-0.16984	-1.134	-0.37409	-0.88364	-0.69223
52	Citrate	0.325	0.33548	0.19799	0.06032	0.21995	0.29803	0.13248	0.29488	1.1955	0.34333	0.095287	0.19216	0.22114	0.23274	0.29235	0.2843	0.53206	0.17552	0.42839	0.35361
53	2-Oxoglutarate	0.53857	0.45562	1.3115	0.39955	0.087109	0.1344	0.15935	0.22986	1.3541	0.38888	0.064549	0.10081	0.10001	0.089333	0.69856	0.59552	-0.54592	-0.1801	0.11001	0.06922
54	2-Oxoglutaramate	0.13428	0.15609	1.5631	0.4762	-0.10211	-0.24517	0.036559	0.07336	-0.082514	-0.023697	0.12575	0.34081	0.10074	0.13268	0.33339	0.31679	-0.11926	-0.039341	0.2091	0.16198
55	Succinate	-0.33854	-0.35955	-1.8611	-0.56701	-0.16076	-0.26581	0.18824	0.31934	1.5504	0.44523	-0.043847	-0.12452	0.12173	0.2024	0.34819	0.3023	-0.056612	-0.018676	0.84108	0.58563
56	Fumarate	0.31606	0.33324	0.45266	0.1379	0.32383	0.5452	0.079878	0.16937	1.2695	0.36458	-0.11385	-0.23832	0.39091	0.40193	0.33704	0.29387	0.19904	0.065662	0.32085	0.31958
57	Malate	0.032766	0.029723	-0.03196	-0.0097369	0.23621	0.3753	0.1033	0.137	1.3286	0.38156	-0.057925	-0.10758	0.4682	0.4589	0.5048	0.47007	0.86078	0.28396	0.86266	0.64555
58	Itaconate	-0.19777	-0.18312	-1.0679	-0.32533	0.065712	0.118	0.093904	0.13626	1.4204	0.4079	-0.069726	-0.14814	0.32194	0.33304	0.56585	0.42028	0.13696	0.045181	1.1102	0.63994
59	2-Hydroxyglutarate/Citramalate	-0.1862	-0.18107	-1.0852	-0.33062	0.054166	0.096451	0.058462	0.08483	1.4201	0.40781	-0.071445	-0.1546	0.33463	0.35331	0.62183	0.43152	0.071935	0.023731	1.2035	0.64315
60	6-Phospho-D-gluconate	0.43513	0.43692	0.277	0.084389	-0.022833	-0.049465	-0.022048	-0.044985	-0.18403	-0.052851	0.20799	0.42914	0.25855	0.27815	-0.35485	-0.396	-0.14015	-0.046233	-0.21662	-0.17082
61	D-Glucono-1-5-lactone 6-phosphate	0.35111	0.3821	0.71402	0.21753	-0.052854	-0.084967	-0.11099	-0.15833	-1.3264	-0.38091	0.090233	0.16619	-0.35161	-0.32207	-0.51204	-0.51847	-0.89632	-0.29569	-0.92001	-0.59638
62	D-Erythrose 4-phosphate	-0.39335	-0.42606	-0.74178	-0.22599	-0.086053	-0.107	0.11907	0.154	1.4937	0.42895	0.032215	0.06438	0.46204	0.50017	0.6366	0.58578	1.2768	0.42121	1.1083	0.8019
63	Sedoheptulose 1-phosphate	0.095646	0.095445	-0.13974	-0.042572	0.14501	0.26228	0.16068	0.26059	1.2757	0.36636	0.016052	0.033715	0.45852	0.50571	0.27631	0.28764	0.66132	0.21816	0.86197	0.69378
64	alpha-D-Ribose 1-phosphate	-0.22357	-0.21484	-0.57449	-0.17502	0.017796	0.028242	0.031028	0.055734	0.97363	0.27961	0.075927	0.13215	0.51248	0.48327	0.43904	0.35875	1.2072	0.39825	1.0149	0.72407
65	Glutathione	-0.049418	-0.051704	-0.33279	-0.10139	-0.049539	-0.067826	0.051561	0.098221	0.81581	0.23429	0.12538	0.31971	0.34055	0.47286	0.31808	0.32431	1.2352	0.40748	0.73139	0.61718
66	Glutathione disulfide	-0.29947	-0.24964	-0.16128	-0.049136	-0.13146	-0.1792	0.06963	0.14228	0.43139	0.12389	0.068935	0.12939	0.29226	0.29133	0.44755	0.37896	0.9495	0.31323	0.99811	0.68701
67	5-Oxoproline	0.70745	0.7097	1.5453	0.47078	0.19034	0.26502	0.2801	0.5614	0.22572	0.064824	0.12896	0.27624	-0.26909	-0.33263	0.29226	0.38692	-1.2433	-0.41015	-0.78996	-0.55355
68	Ascorbate	-0.048103	-0.05054	-0.53037	-0.16158	-0.14956	-0.23192	0.033282	0.059829	0.16725	0.04803	-0.029081	-0.056976	-0.1077	-0.10702	0.092153	0.095146	-0.71511	-0.23591	0.16381	0.129
69	Dehydroascorbate	0.51162	0.5262	-0.26016	-0.079258	0.015391	0.024421	0.019106	0.037056	0.27455	0.078845	0.08791	0.17818	-0.093936	-0.10303	-0.46507	-0.4065	-0.61114	-0.20161	-0.45653	-0.40844
70	gamma-L-Glutamyl-L-cysteine	-0.18238	-0.23503	1.0696	0.32586	-0.043209	-0.061119	-0.058824	-0.13673	-0.79153	-0.22731	0.17347	0.32187	0.18035	0.23648	0.28666	0.3431	0.97626	0.32206	0.30066	0.27043
71	gamma-L-Glutamyl-D-alanine	-0.59158	-0.61485	-0.55737	-0.16981	-0.10205	-0.18145	-0.067106	-0.15628	0.13591	0.039032	-0.11999	-0.24459	0.1865	0.19125	0.53733	0.54943	0.80535	0.26568	0.43209	0.39744
72	5-L-Glutamyl-L-glutamine	-0.5332	-0.5546	-0.36298	-0.11058	-0.32089	-0.46079	-0.13551	-0.2668	-0.4144	-0.11901	-0.0076688	-0.017243	0.28131	0.31313	0.19268	0.2586	0.24519	0.080885	0.56397	0.42922
73	Cystathionine	-0.29276	-0.28163	-0.55598	-0.16938	-0.048469	-0.072098	0.048264	0.079131	1.1554	0.33182	0.16065	0.33219	0.54918	0.58916	0.34896	0.33107	1.4908	0.4918	1.3545	0.78972
74	Dimethylglycine	-0.84096	-0.76976	-1.6288	-0.49624	-0.18283	-0.29714	0.0013389	0.0022901	0.080879	0.023227	-0.088578	-0.16719	0.20253	0.24233	0.17843	0.25477	1.3478	0.44463	1.1503	0.72518
75	Phosphoserine	0.42236	0.45301	0.91491	0.27873	-0.041025	-0.10735	-0.039484	-0.06575	-1.3555	-0.38929	0.06776	0.1469	-0.30716	-0.38821	-0.40086	-0.47627	-0.62666	-0.20673	-0.91634	-0.61236
76	3-Phosphonooxypyruvate	0.34912	0.41136	0.65429	0.19933	-0.003374	-0.0062147	-0.090131	-0.16762	-0.33212	-0.09538	0.066758	0.14471	-0.066103	-0.084219	-0.50032	-0.43618	-0.95378	-0.31464	-0.52601	-0.4604
77	Ornithine	-0.89687	-0.8154	-1.7939	-0.54651	-0.28195	-0.52254	-0.14285	-0.25078	-2.0132	-0.57815	-0.11121	-0.26591	-0.16416	-0.28529	0.31901	0.30569	0.8792	0.29004	0.78563	0.55356
78	L-Citrulline	-0.058293	-0.09499	0.56907	0.17337	-0.059334	-0.1357	0.05456	0.12527	-0.45832	-0.13162	-0.029404	-0.070981	-0.16246	-0.24375	-0.09063	-0.15057	-0.3777	-0.1246	-0.21197	-0.21377
79	Putrescine	-1.4434	-0.94001	-2.6418	-0.80485	-0.49388	-0.72989	-0.17683	-0.45439	-0.65713	-0.18872	0.0068864	0.015074	0.0047039	0.0069102	0.82917	0.68006	1.2713	0.41938	1.1246	0.73939
80	Spermidine	-0.4305	-0.49467	-0.57416	-0.17492	-0.14721	-0.22126	-0.12389	-0.19021	1.3366	0.38385	0.041303	0.072133	0.60541	0.5704	0.66413	0.60978	0.7883	0.26005	0.93025	0.65249
81	alpha-D-Glucosamine 1-phosphate	-0.19069	-0.21229	-0.63768	-0.19427	-0.16832	-0.24041	0.10255	0.18998	1.6853	0.48398	0.035733	0.082407	0.26856	0.2849	0.69866	0.5887	0.30942	0.10207	1.0492	0.68184
82	D-Glucosamine	0.39287	0.47243	-0.57692	-0.17576	0.064289	0.17039	0.11305	0.19322	-0.065791	-0.018894	-0.00034846	-0.0011288	-0.40481	-0.37784	-0.18838	-0.29868	-0.98236	-0.32407	-0.89374	-0.64592
83	1-4-beta-D-Xylan	-1.0535	-0.84034	-2.2022	-0.6709	-0.41485	-0.62085	-0.16649	-0.38879	-1.9076	-0.54782	0.11876	0.32656	-0.10961	-0.14779	0.060228	0.065091	1.8684	0.61637	1.1154	0.70133
84	UDP-N-acetyl-D-glucosamine	0.3064	0.29969	0.57694	0.17577	0.20923	0.28717	0.18733	0.27993	1.3771	0.39549	0.024993	0.044279	0.45897	0.4328	0.55925	0.45472	0.25885	0.085394	1.0067	0.63552
85	Glycolate	0.24284	0.2938	0.92704	0.28243	-0.034535	-0.059731	0.027553	0.070119	-1.3923	-0.39984	0.049339	0.099733	-0.17742	-0.28871	-0.31265	-0.3398	-0.88833	-0.29305	-0.80647	-0.5213
86	Carnosine	0.1144	0.11752	0.018311	0.0055785	0.10223	0.18297	-0.039937	-0.095549	0.94631	0.27176	-0.014511	-0.031259	0.21963	0.25167	0.14245	0.14363	0.19426	0.064084	0.12489	0.11619
87	trans-4-Hydroxy-L-proline	-0.46619	-0.59797	-0.51678	-0.15744	-0.23233	-0.48249	-0.13774	-0.34087	-1.1017	-0.3164	0.026646	0.081282	-0.070052	-0.10549	0.33579	0.41241	0.7609	0.25101	0.33025	0.3118
88	Pantothenol	0.4786	0.50345	-0.77825	-0.2371	0.037401	0.069268	-0.028056	-0.058157	-0.20087	-0.057685	0.13876	0.27824	0.13926	0.17631	-0.79768	-0.66951	-0.38038	-0.12548	-0.44601	-0.34975
89	Taurine	0.22261	0.23796	-0.22663	-0.069043	-0.063124	-0.089638	0.062763	0.1349	0.33981	0.097587	0.086857	0.16665	-0.13673	-0.15956	-0.44313	-0.33487	-0.49794	-0.16427	-0.44872	-0.37416
90	Hypotaurine	0.31075	0.31038	0.37229	0.11342	-0.058985	-0.0929	-0.10123	-0.15769	-1.3192	-0.37884	0.073809	0.12345	-0.23818	-0.29057	-0.46417	-0.51677	-0.77091	-0.25432	-1.051	-0.60323
91	L-Methionine S-oxide	-0.03481	-0.03767	1.7274	0.52627	0.12255	0.17938	0.10345	0.18121	-0.2999	-0.086127	-0.037517	-0.071803	0.13239	0.13117	0.51278	0.49246	0.096147	0.031718	0.28525	0.24678
92	5-Hydroxyindoleacetate	0.042283	0.041871	-0.56037	-0.17072	0.026904	0.052417	-0.03743	-0.061826	-1.4907	-0.42811	-0.050324	-0.12915	-0.4234	-0.43012	-0.37325	-0.43109	-0.41071	-0.13549	-0.72274	-0.53302
93	3-methyldioxyindole	-0.02476	-0.026193	0.8585	0.26155	0.019688	0.03024	0.021216	0.042535	0.10104	0.029018	0.12469	0.27397	-0.012059	-0.016505	0.15794	0.17599	0.70395	0.23223	-0.13981	-0.11355
94	Indole-3-acetaldehyde	-0.19841	-0.19292	0.062591	0.019069	-0.087781	-0.13641	0.0041586	0.0075605	0.34996	0.1005	-0.071508	-0.15694	-0.0072991	-0.0085192	0.24461	0.22504	-0.52057	-0.17173	0.25803	0.18466
95	Indolepyruvate	-0.0051993	-0.0061768	0.98641	0.30051	0.049952	0.069976	0.028073	0.067901	-0.023116	-0.0066386	0.082747	0.21034	0.24225	0.37337	0.22763	0.28739	0.7546	0.24894	0.32872	0.31883
96	6-Hydroxykynurenic acid	-0.29493	-0.29372	-0.99679	-0.30368	-0.097512	-0.20606	-0.18744	-0.30107	-0.071747	-0.020604	-0.059388	-0.13297	-0.030463	-0.044421	-0.0077812	-0.0077471	0.11745	0.038746	0.12626	0.080369
97	kynurenine	-0.35036	-0.25787	-0.80407	-0.24496	0.22937	0.24125	0.023201	0.035359	-0.41281	-0.11855	-0.23051	-0.30869	-0.29072	-0.28169	-0.031844	-0.024672	0.84821	0.27982	0.052732	0.040306
98	g-Oxalo-crotonate	0.20903	0.19626	-0.61398	-0.18705	-0.11442	-0.209	0.039339	0.075548	-1.7342	-0.49802	0.00077672	0.0013736	-0.43634	-0.55862	-0.76282	-0.60814	-1.0952	-0.36129	-0.78989	-0.5877
99	2-Aminomuconate	0.19998	0.2118	-0.62118	-0.18925	0.020814	0.037741	-0.067442	-0.14144	-0.33648	-0.096631	0.00021753	0.00051995	-0.14487	-0.12923	-0.60746	-0.47674	-0.6785	-0.22383	-0.46108	-0.4422
100	Ectoine	0.17322	0.22965	0.6987	0.21286	0.029262	0.049689	-0.034317	-0.061233	-1.4304	-0.41078	0.011149	0.025733	-0.31513	-0.3418	-0.33323	-0.36789	-0.56665	-0.18693	-0.64307	-0.58187
101	Glycerol 3-phosphate	0.19797	0.21609	0.48271	0.14706	0.14726	0.22812	0.047352	0.089545	1.3496	0.38757	0.058255	0.10383	0.41269	0.42414	0.46748	0.49755	0.64335	0.21224	0.64685	0.49211
102	Ethanolamine phosphate	-0.7004	-0.66975	-1.0361	-0.31567	-0.19325	-0.30064	0.00093015	0.0023234	0.89055	0.25575	-0.1221	-0.22955	0.058548	0.096348	0.70439	0.62697	1.4781	0.4876	0.96992	0.63626
103	N-Methylethanolamine phosphate	0.18771	0.2022	-0.42422	-0.12924	-0.015319	-0.033074	-0.030151	-0.05048	-1.0528	-0.30236	8.951e-05	0.00016111	-0.21612	-0.23697	-0.16079	-0.27196	-0.75766	-0.24994	-0.47981	-0.41978
104	Sphingosine	-0.2187	-0.22751	0.52389	0.15961	-0.19268	-0.26114	-0.058083	-0.11825	-0.45255	-0.12996	0.060733	0.1196	-0.41433	-0.46695	0.20951	0.20279	0.3562	0.11751	-0.31107	-0.26346
105	Sphingosine 1-phosphate	0.0094503	0.0098695	-0.36795	-0.1121	0.064208	0.10043	0.081594	0.17418	1.2232	0.35128	-0.072658	-0.13833	0.082008	0.096669	0.37699	0.30479	-0.27972	-0.092277	0.43017	0.28345
106	sn-glycero-3-Phosphoethanolamine	-0.27534	-0.33963	-0.73191	-0.22298	-0.095709	-0.14279	0.10302	0.18204	1.2354	0.35478	-0.16997	-0.33699	-0.11659	-0.13764	0.49952	0.50996	-0.81031	-0.26731	0.49951	0.37182
107	Acetylcholine	-0.55943	-0.57424	-1.2671	-0.38602	-0.52578	-0.66998	-0.29245	-0.5718	0.19993	0.057416	-0.0072069	-0.019199	0.36139	0.59268	0.22553	0.25628	-1.3157	-0.43405	0.47677	0.37045
108	Choline	0.26516	0.36499	0.84962	0.25884	0.050842	0.11214	0.11463	0.21247	0.66765	0.19174	0.076449	0.18508	-0.14335	-0.20365	-0.05611	-0.061146	-0.73955	-0.24397	-0.61705	-0.53448
109	L-Carnitine	0.93427	0.75218	2.4696	0.75238	0.53183	0.6806	0.42474	0.72489	1.7777	0.51053	0.12774	0.23429	-0.040034	-0.047113	0.25064	0.29225	-0.95179	-0.31399	-0.29288	-0.19554
110	acyl-C4-DC	-0.022943	-0.025632	0.22427	0.068325	0.17003	0.24921	-0.07873	-0.15534	-0.3325	-0.09549	-0.08421	-0.1706	-0.096613	-0.12108	0.055795	0.059158	0.16801	0.055424	-0.21552	-0.2071
111	acyl-C51 Tiglylcarnitine	0.33493	0.36641	0.73105	0.22272	-0.085729	-0.13931	-0.032352	-0.056909	-1.4407	-0.41374	0.050956	0.10023	-0.28757	-0.35951	-0.63897	-0.52827	-0.86122	-0.28411	-1.0978	-0.59924
112	acyl-C5-OH	0.35617	0.37738	0.80838	0.24628	-0.059834	-0.10193	-0.071427	-0.11415	-1.3948	-0.40055	0.085413	0.16038	-0.30098	-0.37006	-0.72052	-0.55649	-0.83878	-0.27671	-0.91542	-0.5998
113	acyl-C6-DC	0.25844	0.33413	0.67542	0.20577	-0.0058271	-0.010637	-0.1181	-0.16812	-1.148	-0.32967	0.063104	0.13982	-0.22262	-0.23001	-0.62835	-0.5266	-0.84951	-0.28025	-0.86764	-0.5564
114	acyl-C8 L-octanoylcarnitine	0.24841	0.3086	0.92271	0.28111	-0.047734	-0.079469	-0.088736	-0.16694	-1.2562	-0.36076	0.076687	0.1608	-0.3934	-0.44939	-0.40709	-0.42738	-0.59739	-0.19707	-0.76456	-0.63919
115	acyl-C10 O-Decanoyl-L-carnitine	-0.047279	-0.052784	1.1516	0.35085	0.067566	0.10951	-0.047456	-0.11553	-0.77191	-0.22168	-0.039425	-0.088182	-0.2389	-0.27854	0.14904	0.16128	0.43312	0.14288	-0.17842	-0.20698
116	acyl-C101 O-Decenoyl-L-carnitine	-0.37344	-0.33119	-0.20373	-0.062067	0.038902	0.059593	-0.06558	-0.12305	-0.33247	-0.095478	-0.10584	-0.21767	0.21988	0.24838	0.11006	0.12664	0.44969	0.14835	0.69381	0.46126
117	acyl-C121 O-dodecenoyl-carnitine	-0.19357	-0.1758	0.76016	0.23159	-0.092272	-0.17357	-0.030758	-0.051383	-0.60804	-0.17462	0.021228	0.038263	-0.3887	-0.39198	0.28546	0.25728	0.27747	0.091535	-0.24675	-0.18663
118	acyl-C141 Tetradecenoyl Carnitine	0.23753	0.2788	1.0599	0.3229	-0.040097	-0.067846	-0.078431	-0.16817	-1.4256	-0.40942	0.072825	0.1452	-0.31956	-0.36631	-0.48922	-0.39108	-0.47136	-0.1555	-0.54703	-0.51583
119	Hexanoic acid caproate	0.32929	0.35889	0.61363	0.18695	-0.072729	-0.11551	-0.010682	-0.016958	-1.3312	-0.38229	0.092234	0.17317	-0.53349	-0.51903	-0.42985	-0.48768	-0.87167	-0.28756	-0.92159	-0.66083
120	Octanoic acid caprylate	0.13097	0.14898	0.53399	0.16268	-0.034697	-0.05757	0.11912	0.29447	-1.1717	-0.3365	0.079715	0.13891	-0.43042	-0.61536	-0.21821	-0.29323	-0.23854	-0.078691	-1.5661	-0.85996
121	Nonanoic acid pelargonate	0.1628	0.23418	0.63884	0.19463	-0.040026	-0.10156	0.0070693	0.012707	0.095334	0.027378	0.048851	0.13741	-0.20522	-0.25485	-0.29091	-0.3784	-0.70022	-0.231	-0.44789	-0.40923
122	Decanoic acid caprate	0.041557	0.05142	0.39588	0.12061	-0.049704	-0.095092	0.094263	0.2574	-1.1502	-0.33031	0.091016	0.19542	-0.55696	-0.77466	-0.19637	-0.27003	0.061451	0.020272	-1.1368	-0.8437
123	Dodecanoic acid	-0.18744	-0.20253	-1.0345	-0.31517	-0.039291	-0.066912	0.12554	0.19947	1.7606	0.5056	0.099913	0.18187	-0.39189	-0.44445	0.44629	0.46762	1.0813	0.35672	-0.20891	-0.17474
124	Tetradecanoic acid	-0.1322	-0.11334	-0.76658	-0.23354	0.042995	0.070078	0.081776	0.13123	1.2182	0.34984	-0.052553	-0.11365	0.035973	0.032146	0.31017	0.23659	0.2615	0.086266	0.49998	0.3497
125	Hexadecanoic acid	0.25968	0.33436	0.80779	0.2461	0.0049695	0.0089069	-0.066927	-0.097303	-1.1867	-0.3408	0.033451	0.070637	-0.36335	-0.39945	-0.27652	-0.36354	-0.65219	-0.21515	-0.79985	-0.53957
126	Octadecanoic acid	0.29596	0.35085	0.76812	0.23401	-0.024796	-0.043926	-0.047647	-0.074763	-0.9584	-0.27524	0.065213	0.11921	-0.2998	-0.35267	-0.35037	-0.39541	-0.73543	-0.24261	-0.8253	-0.56062
127	Tetradecenoic acid	0.013379	0.011154	-0.57746	-0.17593	0.11798	0.18284	0.050018	0.072377	1.1672	0.3352	-0.016849	-0.028914	0.36811	0.32661	0.21492	0.1852	0.53294	0.17581	0.65438	0.44798
128	Hexadecenoic acid	-0.39007	-0.28741	-0.70938	-0.21612	-0.061091	-0.083339	0.054944	0.085159	0.99573	0.28596	-0.1083	-0.20994	0.012355	0.012342	0.42726	0.33052	0.054745	0.01806	0.7775	0.41718
129	Octadecenoic acid	-0.15765	-0.12957	-0.27785	-0.084647	0.090291	0.12276	0.13349	0.19508	1.1983	0.34414	-0.10052	-0.17402	0.044639	0.037342	0.63536	0.44212	0.33025	0.10895	0.71832	0.42634
130	Linoleate	-0.073076	-0.065597	-0.25652	-0.07815	0.1263	0.15794	0.090915	0.14738	1.6928	0.48616	-0.011626	-0.020715	0.25072	0.24356	0.67956	0.57069	0.91998	0.3035	0.78578	0.51809
131	Octadecatrienoic acid	-0.074578	-0.068819	-0.30478	-0.092853	0.11461	0.14266	0.11444	0.2269	1.7602	0.50549	-0.0092811	-0.017177	0.17259	0.16352	0.59292	0.58196	0.86855	0.28653	0.70161	0.54533
132	Dodecanedioic acid	0.3424	0.39487	0.7777	0.23693	-0.059787	-0.11497	-0.18434	-0.32028	-1.3708	-0.39368	0.10751	0.22881	-0.32755	-0.33244	-0.44783	-0.49772	-0.84069	-0.27734	-0.83106	-0.60647
133	Nicotinic acid	0.60675	0.57224	0.77221	0.23526	0.17238	0.31991	0.21735	0.49001	0.094798	0.027224	-0.093813	-0.22672	-0.4528	-0.59379	-0.59121	-0.50045	-1.6282	-0.53714	-1.2141	-0.77944
134	Triacanthine	0.83115	0.65626	1.2369	0.37682	0.13197	0.20342	-0.073239	-0.14785	1.3036	0.37436	0.21998	0.34832	0.72399	0.67966	-0.16742	-0.1688	-0.97793	-0.32261	-0.28114	-0.23458
135	N5-Methyl-L-glutamine	-0.3017	-0.30774	-0.35471	-0.10806	-0.10619	-0.15757	0.0066263	0.012431	0.54055	0.15524	0.054909	0.098379	0.065625	0.093717	0.28318	0.30191	0.57288	0.18899	0.34185	0.28124
136	2-Methyleneglutarate	0.33843	0.39248	-0.67224	-0.2048	-0.00091629	-0.0021138	-0.009742	-0.019471	0.27903	0.080134	-0.0043701	-0.01441	-0.28274	-0.28732	-0.31253	-0.34377	-0.88271	-0.2912	-0.52208	-0.49963
137	3-Oxalomalate	0.22831	0.21788	0.446	0.13588	-0.17445	-0.35244	0.030541	0.058286	0.62911	0.18067	0.30276	0.6195	0.51298	0.54895	0.11961	0.13726	0.13869	0.045753	0.62762	0.45897
138	cis-p-Coumarate	-0.13174	-0.12765	0.16317	0.04971	0.0040658	0.0058522	0.16309	0.30287	1.3432	0.38575	0.11288	0.23881	0.29252	0.36147	0.52726	0.4711	0.83923	0.27685	0.8067	0.56744
139	N6-Methyl-L-lysine	-0.071407	-0.086522	0.30215	0.092052	0.019424	0.027469	-0.053723	-0.090135	1.3098	0.37615	0.06447	0.13813	0.46458	0.52911	0.55292	0.56536	0.63909	0.21083	0.65393	0.4468
140	S-Acylglutathione	-0.54199	-0.54274	-1.311	-0.3994	-0.14309	-0.22629	0.057985	0.10499	1.2846	0.36892	-0.1333	-0.2319	0.25339	0.26495	0.55929	0.51106	0.49977	0.16487	1.0853	0.71858
